# Supplementary material for: Nanocomposites of nitrogen-doped carbon dots/hydrotalcite with enhanced solid-state fluorescence for the recognition of latent fingerprints
Source: Royal Society of Chemistry journal article supplement (doi:10.1039/d2ay01952c), 2023-01-01
Supplement: d2ay01952c1.pdf [file d2ay01952c1.pdf]

# **Nanocomposites of Nitrogen-Doped Carbon Dots/Hydrotalcite with Enhanced Solid-State Fluorescence for Recognition of Latent Fingerprints**

Da-Wu Li<sup>1,2,#</sup>, Xing-Fu Zhang<sup>3,#</sup>, Xiao-Tong Zhang<sup>3</sup>, Xiao-Sen lv<sup>1,2,\*</sup>, Nan You<sup>3,\*</sup>

(1. College of Forensic Science, Criminal Investigation Police University of China, Shenyang, Liaoning, 110035, China; 2. Key Laboratory of Impression Evidence Examination and Identification Technology, Ministry of Public Security, Shenyang, Liaoning, 110035, China; 3. College of Petrochemical Engineering, Liaoning Petrochemical University, Fushun, 113001)

Email: lvxiaosen@126.com (X-S lv) and younan\_77@163.com (N You)

## Characterization

The surface morphology of the as-prepared product was observed by a transmission electron microscope (FEI Tecnai G2 20, USA) and scanning electron microscope (Shimadzu SS 550) equipped with an energy-dispersive X-ray analyzer. The crystalline characteristics of the as-prepared product underwent X-ray diffraction analysis using a Bruke Model AXS D8 ADVANCE X-ray diffractometer from  $2\theta$  of  $5\text{--}80^\circ$  with  $0.01^\circ$  scan step. The fluorescence spectral measurements were carried out using a Hitachi F-4500 fluorescence spectrometer.

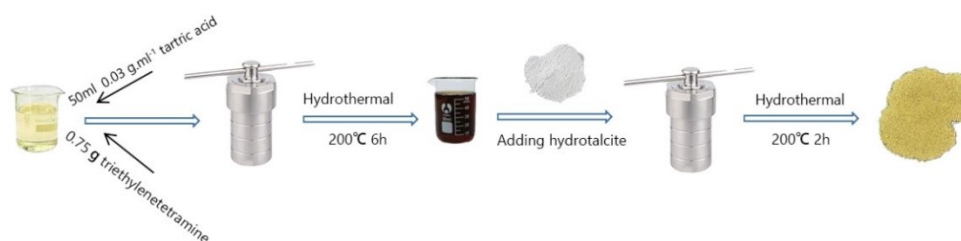

**Scheme S1** A schematic diagram of the N-CDs@hydroxalcite synthesis

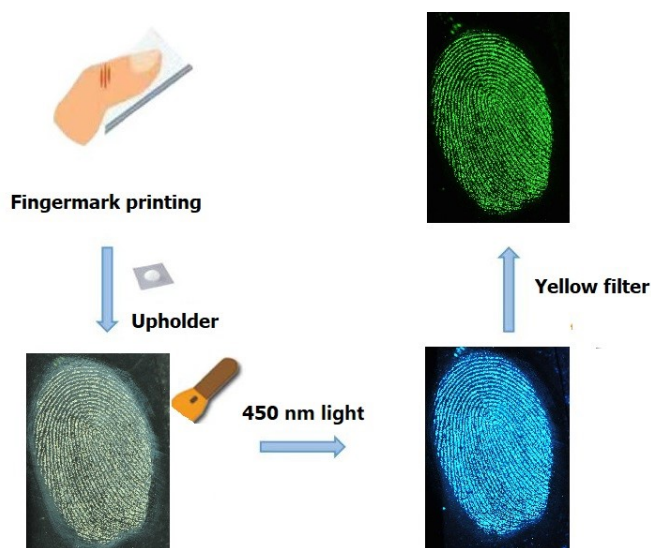

**Scheme S2** General process for the identification of the LFPs.

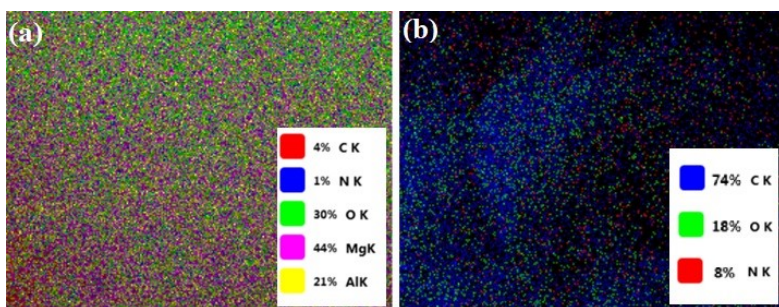

Figure S1 EDS spectrum of the N-CD/hydroxalcite

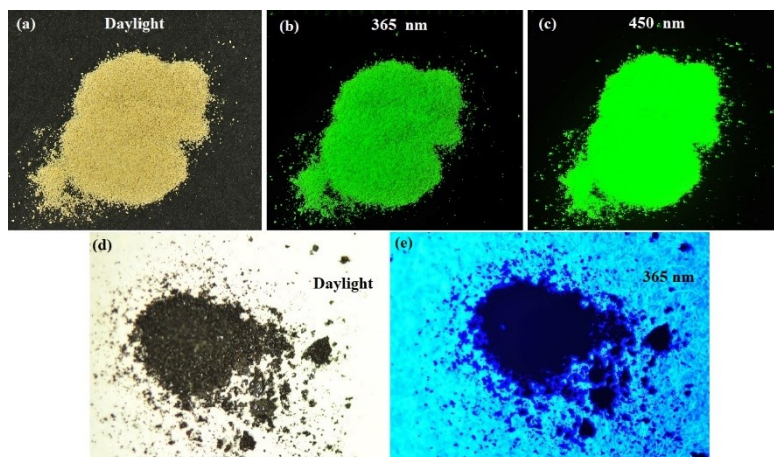

Figure S2 Appearance of the N-CD/hydroxalcite in daylight (a), and under irradiation with 365 nm UV-light (b) and 450 nm light (c).

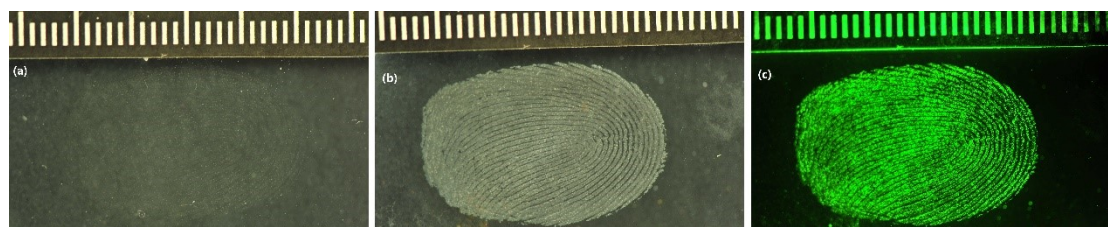

Figure S3 The images of LFPs on glass slide (a) before development, (b) after development using N-CD/hydroxalcite, and (c) under 450 nm light.

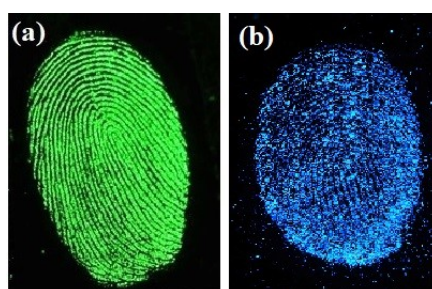

Figure S4 Fluorescent images of the LFPs developed by the (a) N-CD/hydrocalcite and (b) N-CD nanoparticles on glass slide under 450 nm light.

**Table S1** Statistical table of ridge, Furrow and sweat hole size

| Number  | Ridge/mm | Furrow/mm | Sweat pore length/mm | Distance of sweat pore/mm |
|---------|----------|-----------|----------------------|---------------------------|
| 1       | 0.253    | 0.165     | 0.089                | 0.334                     |
| 2       | 0.246    | 0.124     | 0.088                | 0.345                     |
| 3       | 0.2067   | 0.097     | 0.108                | 0.41                      |
| 4       | 0.218    | 0.077     | 0.11                 | 0.326                     |
| 5       | 0.24     | 0.097     | 0.056                | 0.359                     |
| 6       | 0.201    | 0.148     | 0.093                | 0.359                     |
| 7       | 0.184    | 0.073     | 0.059                | 0.256                     |
| 8       | 0.146    | 0.097     | 0.039                | 0.368                     |
| 9       | 0.162    | 0.121     | 0.039                | 0.41                      |
| 10      | 0.18     | 0.048     | 0.056                | 0.379                     |
| 11      | 0.18     | 0.124     | 0.077                | 0.35                      |
| 12      | 0.197    | 0.124     | 0.064                | 0.41                      |
| 13      | 0.218    | 0.097     | 0.114                | 0.32                      |
| 14      | 0.265    | 0.087     | 0.09                 | 0.245                     |
| 15      | 0.265    | 0.121     | 0.128                | 0.36                      |
| 16      | 0.264    | 0.124     | 0.077                | 0.416                     |
| 17      | 0.247    | 0.077     | 0.149                | 0.325                     |
| 18      | 0.194    | 0.1       | 0.083                | 0.315                     |
| 19      | 0.194    | 0.148     | 0.1                  | 0.376                     |
| 20      | 0.232    | 0.124     | 0.06                 | 0.31                      |
| 21      | 0.247    | 0.097     | 0.056                | 0.21                      |
| 22      | 0.27     | 0.073     | 0.06                 | 0.334                     |
| 23      | 0.201    | 0.077     | 0.083                | 0.265                     |
| 24      | 0.257    | 0.097     | 0.073                | 0.325                     |
| 25      | 0.24     | 0.131     | 0.122                | 0.384                     |
| 26      | 0.262    | 0.073     | 0.065                | 0.308                     |
| 27      | 0.201    | 0.124     | 0.108                | 0.297                     |
| 28      | 0.201    | 0.097     | 0.066                | 0.42                      |
| 29      | 0.218    | 0.073     | 0.089                | 0.409                     |
| 30      | 0.285    | 0.21      | 0.064                | 0.5                       |
| 31      | 0.279    | 0.26      | 0.07                 | 0.274                     |
| 32      | 0.253    | 0.135     | 0.046                | 0.339                     |
| 33      | 0.285    | 0.24      | 0.07                 | 0.43                      |
| 34      | 0.269    | 0.21      | 0.059                | 0.4                       |
| 35      | 0.286    | 0.135     | 0.06                 | 0.51                      |
| Max     | 0.286    | 0.21      | 0.14                 | 0.51                      |
| Min     | 0.180    | 0.073     | 0.05                 | 0.21                      |
| Average | 0.23     | 0.12      | 0.08                 | 0.35                      |
